# Supplementary material for: The phase transition behavior of poly(butylene adipate) in the nanoporous anodic alumina oxide
Source: Royal Society of Chemistry journal article supplement (doi:10.1039/c5py01532d), 2015-11-13
Supplement: c5py01532d1.pdf [file c5py01532d1.pdf]

# The Phase Transition Behavior of Poly(butylene adipate) in the Nanoporous Anodic Alumina Oxide

*Ce Mi, Jiandong Zhou, Zhongjie Ren, Huihui Li, Xiaoli Sun, \* Shouke Yan\**

State Key Laboratory of Chemical Resource Engineering, Beijing University of

Chemical Technology, Beijing 100029, China (skyan@mail.buct.edu.cn;

xiaolisun@mail.buct.edu.cn)

KEYWORDS: Poly(butylenes adipate); AAO template; nanoconfinement; phase  
transition

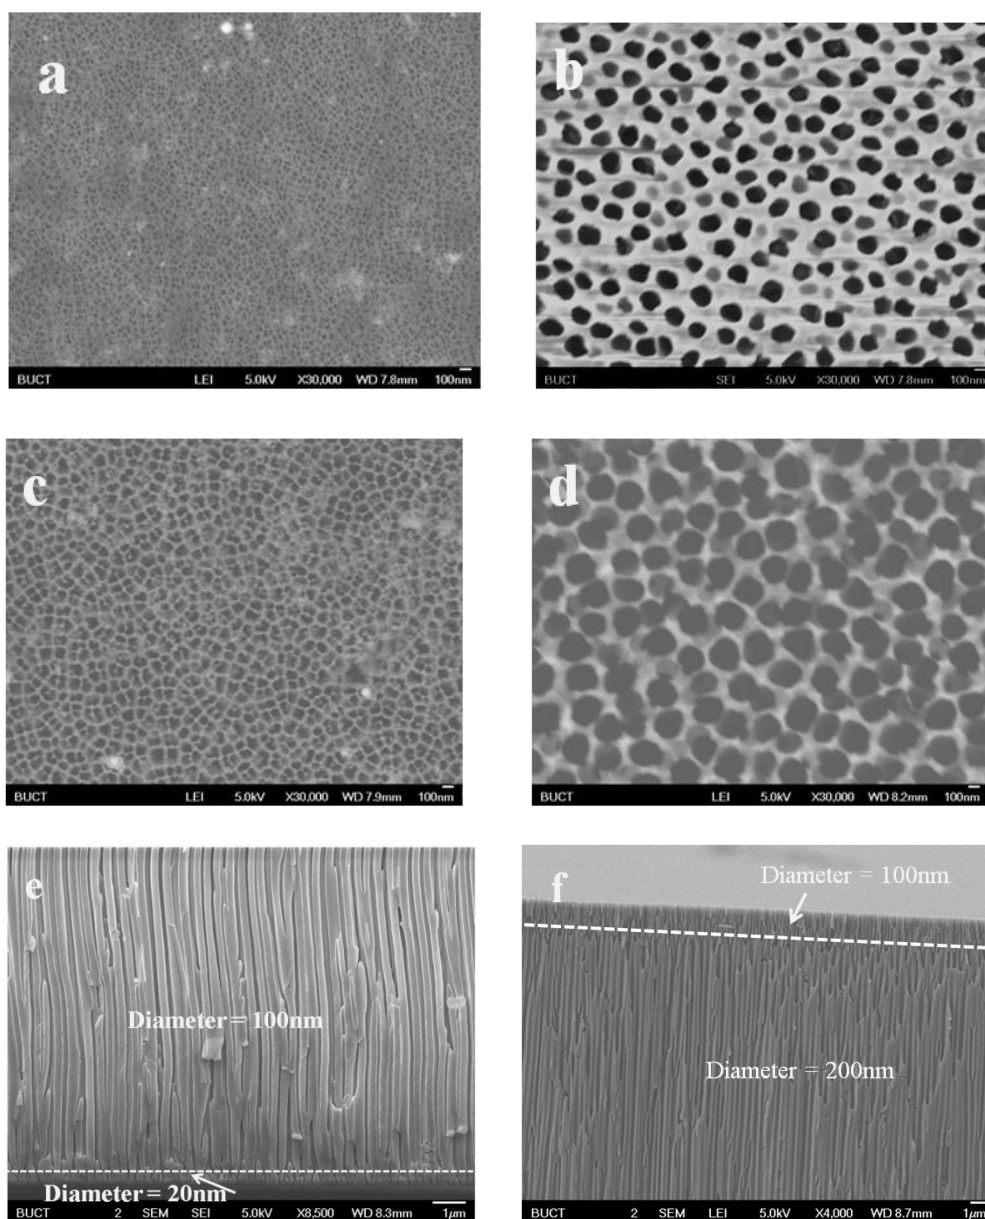

**Figure S1.** SEM images of the front-side of AAO template with the nominal pore diameter of (a) 20 nm and (c) 100 nm). SEM images of the back-side of AAO template with the nominal pore diameter of (c) 20 nm and (d) 100 nm). The side view of AAO templates with the nominal diameter of (e) 20 nm and (f) 100 nm.

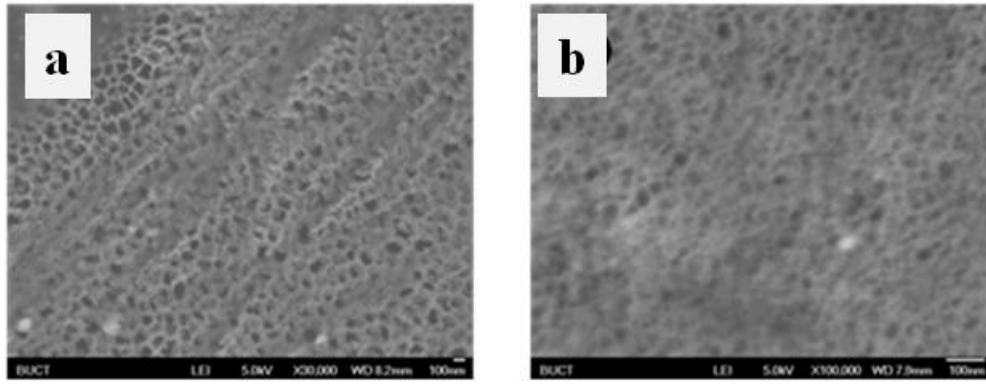

**Figure S2.** SEM images of the front-side view of AAO templates after the infiltration of PBA in the (a) D200 and (b) D100.

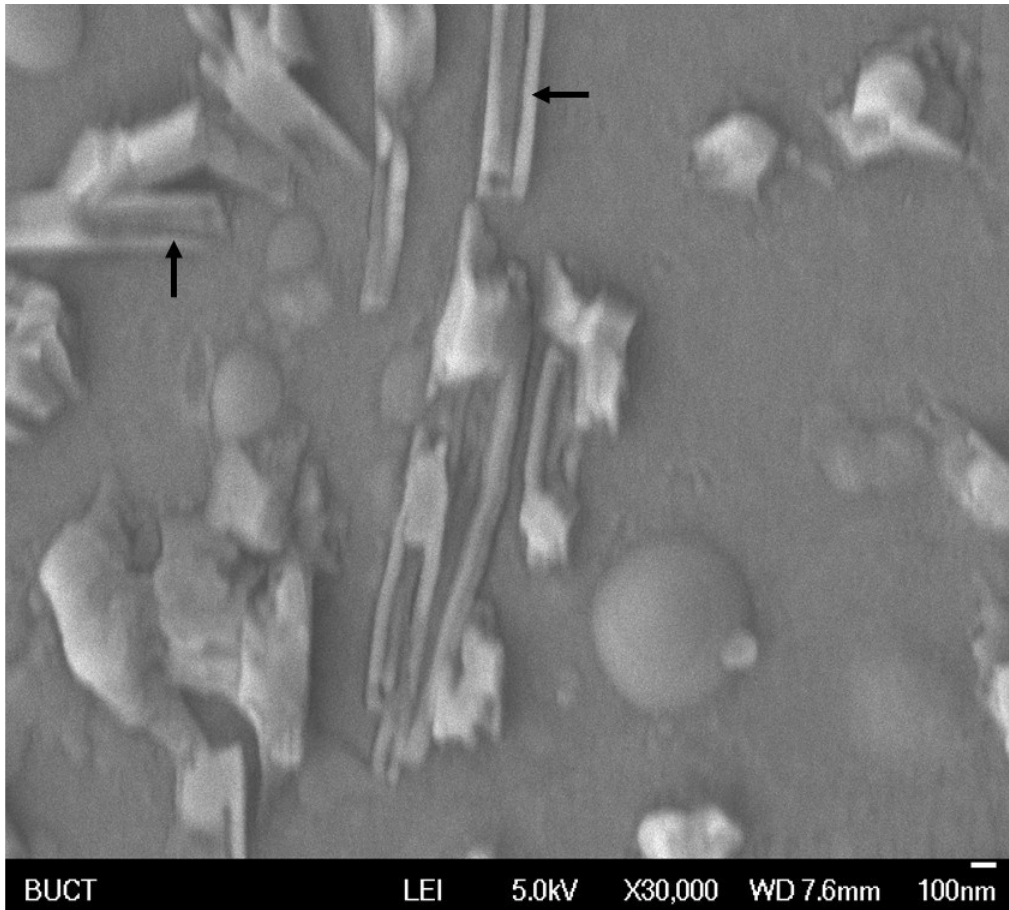

**Figure S3.** A SEM image showing the nanostructures of PBA infiltrated by the D200 after removing the AAO template.

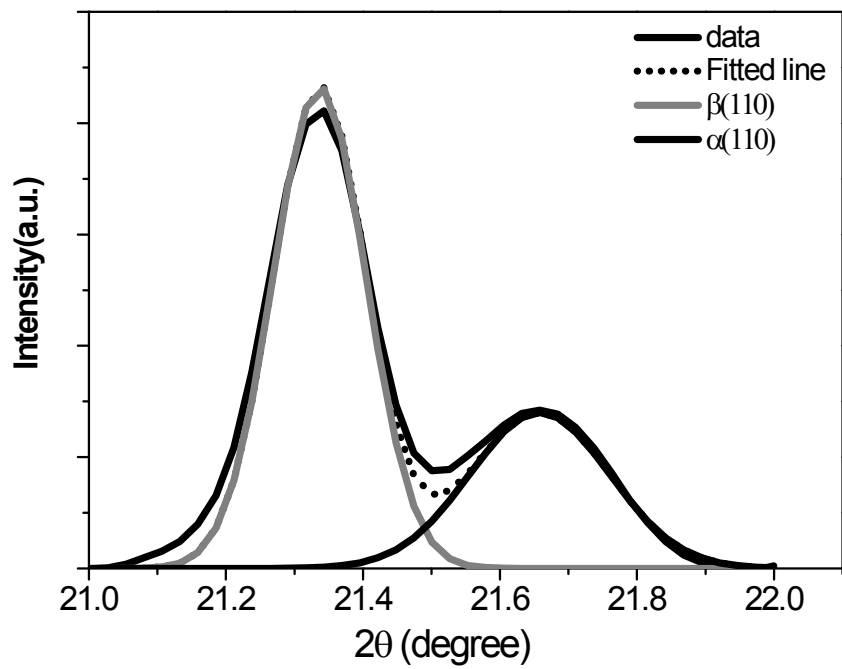

**Figure S4.** Curve-fitting analysis for the WAXD pattern of PBA in AAO (D100nm) at the temperature of 49 °C.
